# Supplementary material
Source: MDPI journal article supplement (https://www.mdpi.com/2311-7524/8/1/57)
Supplement: s1 [file s1]

Table S4. The RSD values of different volatile metabolites of B80124 and B80461.

| Compounds | Average<br>peak area of<br>B80124<br>(Log <sub>10</sub> A) | RSD/% | Average<br>peak area of<br>B80124<br>(Log <sub>10</sub> A) | RSD/% |
|-----------|------------------------------------------------------------|-------|------------------------------------------------------------|-------|
| KMW0499   | 6.74                                                       | 5.35  | 4.90                                                       | 11.63 |
| KMW0212   | 6.69                                                       | 1.67  | 6.15                                                       | 1.43  |
| KMW0345   | 5.85                                                       | 0.92  | 5.43                                                       | 3.23  |
| KMW0110   | 5.19                                                       | 7.84  | 0.00                                                       | 0.00  |
| KMW0152   | 5.79                                                       | 2.69  | 4.65                                                       | 8.67  |
| KMW0288   | 5.81                                                       | 1.27  | 5.45                                                       | 3.55  |
| QWM0007   | 5.12                                                       | 6.82  | 4.01                                                       | 6.67  |
| WMW0081   | 4.83                                                       | 1.92  | 4.47                                                       | 3.81  |
| XMW0239   | 4.43                                                       | 4.26  | 4.04                                                       | 2.99  |
| XMW0427   | 4.94                                                       | 1.60  | 4.60                                                       | 3.88  |
| NMW0135   | 7.50                                                       | 6.22  | 6.79                                                       | 3.96  |
| D27       | 7.29                                                       | 5.66  | 4.55                                                       | 4.80  |
| XMW0811   | 6.11                                                       | 5.02  | 5.02                                                       | 2.44  |
| XMW0859   | 4.28                                                       | 2.41  | 3.94                                                       | 5.00  |
| D378      | 7.34                                                       | 6.09  | 4.21                                                       | 7.94  |
| KMW0504   | 4.56                                                       | 1.38  | 4.84                                                       | 4.63  |
| KMW0158   | 6.02                                                       | 1.28  | 6.32                                                       | 3.08  |
| KMW0186   | 3.98                                                       | 2.38  | 4.98                                                       | 4.92  |
| KMW0253   | 4.62                                                       | 1.08  | 4.96                                                       | 3.14  |
| XMW0048   | 4.94                                                       | 1.86  | 5.30                                                       | 4.16  |
| NMW0108   | 4.72                                                       | 2.08  | 5.10                                                       | 2.53  |
| XMW0947   | 4.61                                                       | 1.19  | 4.96                                                       | 3.09  |
