# Supplementary material
Source: MDPI journal article supplement (https://www.mdpi.com/2311-7524/8/1/57)
Supplement: s1 [file s1]

Table S1. The ELISA-value of "B80124" and "B80461" with inoculated.

|         | O.D. value |       |       |       |       |       | Average |
|---------|------------|-------|-------|-------|-------|-------|---------|
| B80124  | 0.214      | 0.190 | 0.171 | 0.269 | 0.218 | 0.325 | 0.235   |
|         | 0.212      | 0.188 | 0.167 | 0.258 | 0.308 | 0.308 |         |
|         | 0.285      | 0.185 | 0.166 | 0.257 | 0.301 | 0.207 |         |
| B80461  | 4.513      | 4.009 | 4.885 | 4.508 | 4.513 | 3.063 | 4.35    |
|         | 4.416      | 4.433 | 4.683 | 4.303 | 4.241 | 4.496 |         |
|         | 4.496      | 4.119 | 4.506 | 4.009 | 4.839 |       |         |
| Tealthy | 0.185      | 0.179 | 0.176 |       |       |       | 0.180   |
